# Supplementary material
Source: PubMed Central journal article supplement (PMC6107876)
Supplement: blood841676-suppl1.pdf [file blood841676-suppl1.pdf]

## SUPPLEMENTAL APPENDIX

### Supplemental Table 1. Cohort of Ph-like ALL in SR ALL

Provided as an excel table in “Supplemental Tables”.

### Supplemental Table 2. Primers for mPCR/sPCR assays

| PRIMERS       | ASSAY                                  | SEQUENCE (5'-3')           |
|---------------|----------------------------------------|----------------------------|
| EEF2-F(2)     | Amplifiable RNA QC                     | GGACCCCATCTTCAAGGTGT       |
| EEF2-R(2)     | Amplifiable RNA QC                     | TCTCTGGATTGGCTTCAGGT       |
| ABL1E3R2      | Multiplex 1, Multiplex 7               | TGTAGTTGCTTGGGACCCAGCCTTG  |
| NUPe20F1      | Multiplex 1                            | CAGTGGCCTTGGAGGAAAACCCAGT  |
| ETV6EX5F      | Multiplex 1, Multiplex 6               | CGTGATCCAGCTGATGCC         |
| ZMIZ1e17_F1   | Multiplex 1                            | GCAACACCATCCAGATCACCGTCAC  |
| RCSD1e3_F3    | Multiplex 4, Multiplex 2               | CAGCCAGTAAACCAACCCGAAGGAA  |
| RANBP2e16F2   | Multiplex 1                            | TGGTTCTTTGCGAAATGCAGATTCA  |
| CSF1Re14_R2   | Multiplex 2                            | TGGCTCATGATCTTCAGCTCGGACA  |
| PDGFRBe12R1   | Multiplex 2, Multiplex 6, Multiplex 10 | ATGGCCGTCAGAGCTCACAGACTCA  |
| ABL2e5R3      | Multiplex 2                            | GTCGTGGATGGGGGACACACCATAG  |
| SSBP2e14_F1   | Multiplex 2                            | CCCATGGGTGGATTAGGAGGAATGG  |
| EBF1e14F2     | Multiplex 2, Multiplex 5               | CACGAGCATGAACGGATACGGCTCT  |
| ZEB2e10_F1    | Multiplex 2                            | CTCCGACTCCTGTCTGTCTCGCAA   |
| PAG1e7_F1     | Multiplex 2                            | CCTTCAGGAGAAGGAAGGGGGAGAGG |
| ZC3HAV1EX12F  | Multiplex 2                            | GAAGAAATCGCAGATGAAGGAAG    |
| ABL2EX2_3R(2) | Multiplex 2                            | TAGTGATGCTGAGTGTGTTATCACC  |
| JAK2e19R3     | Multiplex 3, Multiplex 5               | CGGCACATCTCCACACTCCCAAAAT  |
| BCRe1F1       | Multiplex 3, Singleplex                | GTGCCATAAGCGGCACCGGCACT    |
| STRN3e9F1     | Multiplex 3                            | ATGATGAGCTGCCCCACATCCCTTC  |
| PAX5e4F1      | Multiplex 3                            | ACCAACCAGTCCCAGCTTCCAGTCA  |
| ATF7IPe12_F2  | Multiplex 3                            | AACCCATAACAACCAGCACCGCCTCT |
| SSBP2e7F1     | Multiplex 3                            | GTCCCAGGAAGTCAGCCATTAC     |
| ABL1e4_R2     | Multiplex 4                            | GCCACCGTCAGGCTGTATTTCTTCC  |
| FOXP1e19F1    | Multiplex 4                            | GCAGTATGGACAGTGGATGAAGTA   |
| NUP153e9F1    | Multiplex 4                            | TGGTGAATTCAGGAAGACTAATCA   |
| SFPQEX7F      | Multiplex 4                            | GCAAGAGGAGGAACGACGTA       |
| SPTAN1EX2F    | Multiplex 4                            | GGGGTCAAAGTGCTGGAAC        |
| SNX2e3F1      | Multiplex 4                            | CGGAACCTTCTCCTGCAGTCACACC  |
| TERF2e7F1     | Multiplex 5                            | ACCATCCAAGCCCACCGTTCTCAAC  |
| ETV6e3F1      | Multiplex 5, Multiplex 7, Multiplex 10 | ATGGCAAAGCTCTCCTGCTGCTGAC  |
| TNIP1e13F2    | Multiplex 6                            | AAGCACTGAGCATCCAAACC       |
| MYBe6F1       | Multiplex 6                            | TCAGGCTCCGCCTACAGCTCAACTC  |
| ATF7IPex9F    | Multiplex 6                            | CTGAGGTGCCTAGTGGAATC       |
| TYK2e19R2     | Multiplex 6                            | TCCGGGTTACAGTCAAGACGTCAG   |
| NTRK3_R1      | Multiplex 6                            | ATCTTGTCCTTGGTCGGGCTGAGGT  |
| LSM14Ae3F1    | Multiplex 7                            | TCCTTAGTTGGGCAGCAGTT       |
| CENPCe4F1     | Multiplex 7                            | AGTGCCTAATTCAACACGCA       |
| SSBP2e4F1     | Multiplex 8                            | CTGTGCAGCTCCAGAGAGAC       |

| PRIMERS     | ASSAY        | SEQUENCE (5'-3')          |
|-------------|--------------|---------------------------|
| SSBP2e11F1  | Multiplex 8  | ACCCATCATGCCTAGTCCAG      |
| PCM1e36F1   | Multiplex 8  | CTGTCCTGTGAAACCCTGTTACC   |
| JAK2e14R2   | Multiplex 8  | CCAAATGCTTGTGAGAAAGC      |
| RFX3e16F1   | Multiplex 9  | TTCGGGACTTAACCTTACGC      |
| ZNF274e4F1  | Multiplex 9  | GTTTTACCCCGGAAGAGTGG      |
| JAK2e20R1   | Multiplex 9  | CACATCTCCACACTCCCAAA      |
| AGGF1e8F1   | Multiplex 10 | CGAATCCCTGAAGTTGGTGT      |
| HOOK3e22F1  | Multiplex 10 | GGGAATGACCCTGCATAAAA      |
| ZMYND8e18F1 | Multiplex 10 | ACTGGAAGCACAATAGCTGAG     |
| FGFR1e11R1  | Multiplex 10 | CACAGCCACTTTGGTCCACAC     |
| JAK2e17R2   | Singleplex   | TCTCCTCCACTGCAGATTTCCCACA |
| TBL1XR1e7F2 | Singleplex   | TCCAAGCAACAAGGATGTCA      |
| CSF1Re12R1  | Singleplex   | GGAACTCCCACTTCTCGTTG      |

### Supplemental Table 3. RNA-sequencing metrics

Provided as an excel table in "Supplemental Tables".

### Supplemental Table 4. Analysis of sex, WBC and MRD

| Clinical features  | Ph-like     | Non Ph-like | P value |
|--------------------|-------------|-------------|---------|
| Male               | 70 (50.4%)  | 469 (53.6%) | .48     |
| Female             | 69 (49.6%)  | 406 (46.4%) |         |
| WBC<br>(mean ± SD) | 15.9±13.7   | 13.4±11.9   | .31     |
| MRD Day 29         |             |             | .064    |
| <0.01%             | 101 (75.4%) | 702 (82.1%) |         |
| ≥0.01%             | 33 (24.6%)  | 153 (17.9%) |         |

### Supplemental Table 5. Multivariate analysis for childhood SR ALL (n=1023)

| Clinical features                            | Event-free survival |           |         | Overall survival |           |         |
|----------------------------------------------|---------------------|-----------|---------|------------------|-----------|---------|
|                                              | Hazard Ratio        | 95% CI    | P value | Hazard Ratio     | 95% CI    | P value |
| Sex<br>Male vs. Female                       | 1.134               | 0.75-1.72 | .55     | 1.078            | 0.58-1.99 | .81     |
| MRD at end of induction<br><0.01% vs. ≥0.01% | 0.400               | 0.26-0.61 | <.0001  | 0.360            | 0.19-0.67 | <.0001  |
| Ph-like ALL<br>Yes vs. No                    | 1.725               | 1.05-2.84 | .032    | 1.446            | 0.67-3.11 | .34     |

**Supplemental Figure 1.**

Algorithm for identifying Ph-like ALL and targetable alterations.  
QNS, quantity not sufficient.

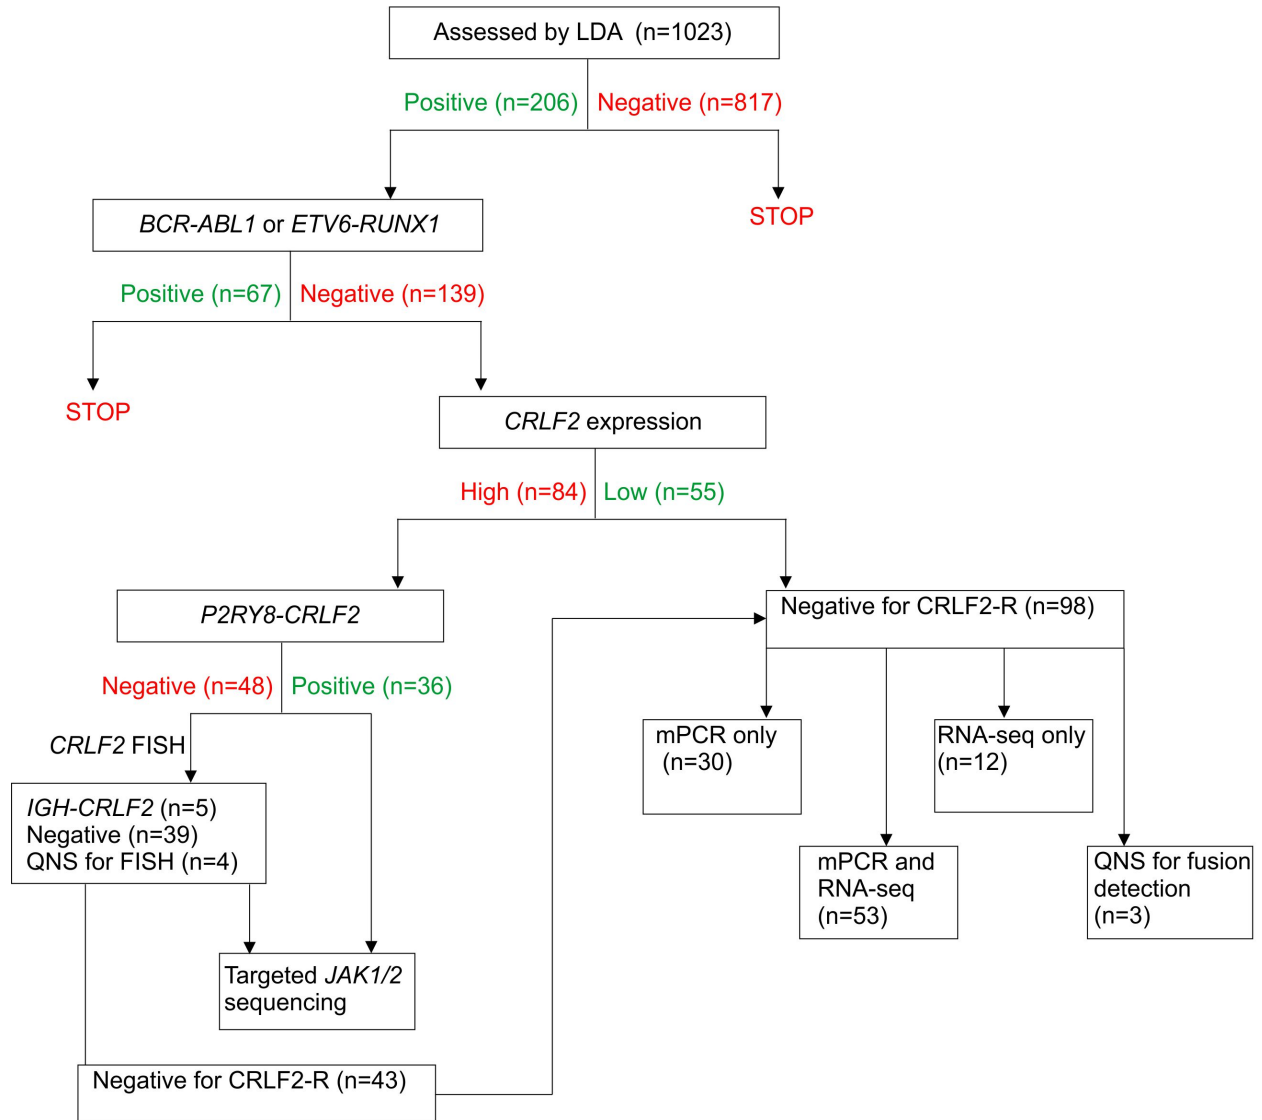

## References

1. S. C. Reshmi, R. C. Harvey, K. G. Roberts, et al.: Targetable kinase gene fusions in high-risk B-ALL: a study from the Children's Oncology Group. *Blood*. 2017;129:3352-3361.
